# Supplementary material
Source: PubMed Central journal article supplement (PMC5417211)
Supplement: SD5.pdf [file SD5.pdf]

SUPPLEMENTAL INFORMATION

RNAPoIII\_LSU sequence alignment (accession no. KX347439) 1,181/1,184 base pairs (99%) similarity.

|                                                                                                                                                                                                         |
|---------------------------------------------------------------------------------------------------------------------------------------------------------------------------------------------------------|
| <p>KM820664<br/>                     GCGCTGGACGACGTGCACGCTTCGTACGACGGCACGGTGCGGAACGCGAATCAGGAGCTC<br/>                     1 GCGCTGGAAGACGTGCACGCTTCGTACGACGGCACGGTGCGGAACGCGAATCAGGAGCTC 60</p>        |
| <p>KM820664<br/>                     ATCCAGCTGGCGTATGGCGAAGACGGCCTGGACGGCGCACGCATCGAGGGCAACCAGGCC<br/>                     61 ATCCAGCTGGCGTATGGCGAAGACGGCCTGGACGGCGCACGCATCGAGGGCAACCAGGCC 120</p>      |
| <p>KM820664<br/>                     TTCCCGATTCCGCACATGACGAACTCGGAGATGGTGGACAGGTACCGCTACGAATACAGG<br/>                     121 TTCCCGATTCCGCACATGACGAACTCGGAGATGGTGGACAGGTACCGCTACGAATACAGG 180</p>     |
| <p>KM820664<br/>                     GACGAGGGCGGCTTCTCGGACAACATGGGCGGCCAATACATGGATCCGTTCTGTGCGCGAC<br/>                     181 GACGAGGGCGGCTTCTCGGACAACATGGGCGGCCAATACATGGATCCGTTCTGTGCGCGAC 240</p>   |
| <p>KM820664<br/>                     TCGCTGCTGCGCGATCCGCAGAGCGTGCTGAGGCTGCAAGAGGAGTTCGACCAGCTCATG<br/>                     241 TCGCTGCTGCGCGATCCGCAGAGCGTGCTGAGGCTGCAAGAGGAGTTCGACCAGCTCATG 300</p>     |
| <p>KM820664<br/>                     AAGGACCGCGGATGTGCGCCTCATCATCGACATGGAGGACAAGAACAAGCTCAAGATG<br/>                     301 AAGGACCGCGGATGTGCGCCTCATCATCGACATGGAGGACAAGAACAAGCTCAAGATG 360</p>         |
| <p>KM820664<br/>                     AACCTGCCTGTGAACGTGCGCGTCTCATCCAGAACGCGCGCACGACGATGGGTAAGCGC<br/>                     361 AACCTGCCTGTGAACGTGCGCGTCTCATCCAGAACGCGCGCACGACGATGGGTAAGCGC 420</p>       |
| <p>KM820664<br/>                     AGTCAGGTGTGAACTTAAACCCGATCACTGTGATCAACCGCGTGCGGGAGCTGCAGGAG<br/>                     421 AGTCAGGTGTGAACTTAAACCCGATCACTGTGATCAACCGCGTGCGGGAGCTGCAGGAG 480</p>       |
| <p>KM820664<br/>                     GACCTCGTGCAGCTGTTCCCTCACACCACAAGGACTACCACGGCCGCTTCGTGAACGCG<br/>                     481 GACCTCGTGCAGCTGTTCCCTCACACCACAAGGACTACCACGGCCGCTTCGTGAACGCG 540</p>       |
| <p>KM820664<br/>                     CTCAGCCGGGAGCGTGTGGAGCGGGCACTGACGCTCTTCGGCATCCATCTGCGCCAGATT<br/>                     541 CTCAGCCGGGAGCGTGTGGAGCGGGCACTGACGCTCTTCGGCATCCATCTGCGCCAGATT 600</p>     |
| <p>KM820664<br/>                     CTCGGCTCCAAGCGGGTGTGAAGGAGTACAAGCTGAACGACAAGGCGTTCGAGTACTTG<br/>                     601 CTCGGCTCCAAGCGGGTGTGAAGGAGTACAAGCTGAACGACAAGGCGTTCGAGTACTTG 660</p>       |
| <p>KM820664<br/>                     CTGAAGGAGATCCGCACCAAATACCAGCAGTCCCTCATCACCCCTGGTGAGATCATCGGC<br/>                     661 CTGAAGGAGATCCGCACCAAATACCAGCAGTCCCTCATCACCCCTGGTGAGATCATCGGC 720</p>     |
| <p>KM820664<br/>                     GCCATCGCCGCGCAGTCGTGCGGCGAGCCAGCGACGCAGATGACGCTGAATACCTTYCAC<br/>                     721 GCCATCGCCGCGCAGTCGTGCGGCGAGCCAGCGACGCAGATGACGCTGAATACCTTYCAC 780</p>     |
| <p>KM820664<br/>                     AACGCCGGCATCTCGTCCAAGAACGTGACCCTCGGCGTGCCGCGGCTACTGGAGCTGCTG<br/>                     781 AACGCCGGCATCTCGTCCAAGAACGTGACCCTCGGCGTGCCGCGGCTACTGGAGCTGCTG 840</p>     |
| <p>KM820664<br/>                     AATGTAAGCAAGAACCAGCGCAATGCCAGCGTGGCCGTCTGCCTCATCCACGAGTACCAG<br/>                     841 AATGTAAGCAAGAACCAGCGCAATGCCAGCGTGGCCGTCTGCCTCATCCACGAGTACCAG 900</p>     |
| <p>KM820664<br/>                     AAGCGCAACAAGGCACAGGAGGCACAGCAGTTCATCGAGTACTGCAAGCTGGCGAACATC<br/>                     901 AAGCGCAACAAGGCACAGGAGGCACAGCAGTTCATCGAGTACTGCAAGCTGGCGAACATC 960</p>     |
| <p>KM820664<br/>                     ACAACGACGGTGCAGATCATCTACGACCCCAACCCGCGAAACACCGTCGTTGCCGAAGAC<br/>                     961 ACAACGACGGTGCAGATCATCTACGACCCCAACCCGCGAAACACCGTCGTTGCCGAAGAC 1020</p>    |
| <p>KM820664<br/>                     GAGGAGATGATTTCGCTGGGAGCAGGCGGTGATGAACGAGGAGGAGGAGGAGCAGGACGCG<br/>                     1021 GAGGAGATGATTTCGCTGGGAGCAGGCGGTGATGAACGAGGAGGAGGAGGAGCAGGACGCG 1080</p> |
| <p>KM820664<br/>                     GACCAGCCACCGTCGCCCTTTATCGCGCTTATCCTCGACAACGACCTTTCAACGAC<br/>                     1081 GACCAGCCACCGTCGCCCTTTATCGCGCTTATCCTCGACAACGACCTTTCAACGAC 1140</p>           |
| <p>KM820664<br/>                     AAGCGGCTTAACATGAAAGATGTGAAGAGCGGATCCGGCAGGT<br/>                     1141 AAGCGGCTTAACATGAAAGATGTGAAGAGCGGATCCGGCAGGT 1184</p>                                     |

ITS-1 Sequence alignment (accession no. KX347438) 282/295 base pairs (96%) similarity

|                                                                                                                                                    |
|----------------------------------------------------------------------------------------------------------------------------------------------------|
| JX195640<br>CTGGATCATTTTCCGATGATTACACCAAAAAAACATACAATCAAAACACGGGGAGGTGT<br>1 CTGGATCATTTTCCGATGATTACACCAAAAAAACATACAATGAAACACGGGGAGGTGT 60         |
| JX195640<br>CTCTCTCTTTTTGTCAGATAGCGCCTTTCCACATACACACACACAACAATATATATG<br>61 ATCTCTCTTTTTGTCAGATAACGCCTTTCCACAT - - ACACACACACAACAATATATATG 118     |
| JX195640<br>TATATATGTAGTGTTATACTCAATTATACAGTAAACAGAAAAACAAAGGCCGGTTCGACAT<br>119 TATATATGTATTGTTATACTCAATTATACAGTAAACAGAAAAACAAAGGCCGGTTCGACAT 178 |
| JX195640<br>ATAAACACCGCGCG - -TATATATATATACAACGAAAATGTCCTTTCTTACGGGGGCTTTT<br>179 ATAAACACCGCACGTATATATATATATACAACGAAAATGTCCTTCTTACGGGGGCTTTT 238  |
| JX195640<br>CTGGCGGTGTGTTGTGGATAAC- GCTCACATAACGTGTCGCG- TGGATGACTTGG 328<br>239 CTGGCGGTGTGTTGTGGATAACGGCTCACATAACGTGTCGCGATGGATGACTTGG 293       |
